# Supplementary material for: Modelling Disease Mitigation at Mass Gatherings: A Case Study of COVID-19 at the 2022 FIFA World Cup
Source: bioRxiv or medRxiv preprint supplement (doi:10.1101/2023.03.27.23287214), 2023-03-29
Supplement: Supplementary file [file media-1.pdf]

# Supplementary Material: Derivation of $R_0$ Given No Population Stratification and Vaccination.

Martin David Grunnill

March 12, 2023

Model's ODEs without population stratification or vaccination:

$$\begin{aligned}
 dS/dt &= \frac{S\beta(M_H + M_I + F_I + \theta(F_A + M_A + P_A + P_I))}{N} \\
 dE/dt &= \frac{S\beta(M_H + M_I + F_I + \theta(F_A + M_A + P_A + P_I))}{N} - \epsilon_1 E \\
 dG_A/dt &= \epsilon_1(1 - p_s)E - \epsilon_2 G_A \\
 dG_I/dt &= \epsilon_1 p_s E - \epsilon_2 G_I \\
 dP_A/dt &= \epsilon_2 G_A - \epsilon_3 P_A \\
 dP_I/dt &= \epsilon_2 G_I - \epsilon_3 P_I \\
 dM_A/dt &= \epsilon_3 P_A - \gamma_1 M_A \\
 dM_I/dt &= (1 - p_{hs})\epsilon_3 P_I - \gamma_1 M_I \\
 dM_H/dt &= p_{hs}\epsilon_3 P_I - \epsilon_H M_H \\
 dF_A/dt &= \gamma_1 M_A - \gamma_2 F_A \\
 dF_I/dt &= \gamma_1 M_I - \gamma_2 F_I \\
 dF_H/dt &= \epsilon_H M_H - \gamma_H F_H \\
 dR/dt &= \gamma_2(F_A + F_I) + \gamma_H F_H
 \end{aligned} \tag{1}$$

Matrix corresponding to transmission events:

$$T = \begin{bmatrix}
 0 & 0 & 0 & \beta\theta & \beta\theta & \beta\theta & \beta & \beta & \beta\theta & \beta & 0 \\
 0 & 0 & 0 & 0 & 0 & 0 & 0 & 0 & 0 & 0 & 0 \\
 0 & 0 & 0 & 0 & 0 & 0 & 0 & 0 & 0 & 0 & 0 \\
 0 & 0 & 0 & 0 & 0 & 0 & 0 & 0 & 0 & 0 & 0 \\
 0 & 0 & 0 & 0 & 0 & 0 & 0 & 0 & 0 & 0 & 0 \\
 0 & 0 & 0 & 0 & 0 & 0 & 0 & 0 & 0 & 0 & 0 \\
 0 & 0 & 0 & 0 & 0 & 0 & 0 & 0 & 0 & 0 & 0 \\
 0 & 0 & 0 & 0 & 0 & 0 & 0 & 0 & 0 & 0 & 0 \\
 0 & 0 & 0 & 0 & 0 & 0 & 0 & 0 & 0 & 0 & 0 \\
 0 & 0 & 0 & 0 & 0 & 0 & 0 & 0 & 0 & 0 & 0 \\
 0 & 0 & 0 & 0 & 0 & 0 & 0 & 0 & 0 & 0 & 0
 \end{bmatrix} \tag{2}$$

Matrix corresponding to transitions between and out of infection stages:

$$\Sigma = \begin{bmatrix}
 -\epsilon_1 p_s - \epsilon_1(1 - p_s) & 0 & 0 & 0 & 0 & 0 & 0 & 0 & 0 & 0 & 0 \\
 \epsilon_1(1 - p_s) & -\epsilon_2 & 0 & 0 & 0 & 0 & 0 & 0 & 0 & 0 & 0 \\
 \epsilon_1 p_s & 0 & -\epsilon_2 & 0 & 0 & 0 & 0 & 0 & 0 & 0 & 0 \\
 0 & \epsilon_2 & 0 & -\epsilon_3 & 0 & 0 & 0 & 0 & 0 & 0 & 0 \\
 0 & 0 & \epsilon_2 & 0 & -\epsilon_3 p_{hs} - \epsilon_3(1 - p_{hs}) & 0 & 0 & 0 & 0 & 0 & 0 \\
 0 & 0 & 0 & \epsilon_3 & 0 & -\gamma_{A1} & 0 & 0 & 0 & 0 & 0 \\
 0 & 0 & 0 & 0 & \epsilon_3(1 - p_{hs}) & 0 & -\gamma_{I1} & 0 & 0 & 0 & 0 \\
 0 & 0 & 0 & 0 & \epsilon_3 p_{hs} & 0 & 0 & -\epsilon_H & 0 & 0 & 0 \\
 0 & 0 & 0 & 0 & 0 & \gamma_{A1} & 0 & 0 & -\gamma_{A2} & 0 & 0 \\
 0 & 0 & 0 & 0 & 0 & 0 & \gamma_{I1} & 0 & 0 & -\gamma_{I2} & 0 \\
 0 & 0 & 0 & 0 & 0 & 0 & 0 & \epsilon_H & 0 & 0 & -\gamma_H
 \end{bmatrix} \tag{3}$$

$R_0$  is the spectral radius of Next Generation Matrix with large domain:

$$R_0 = \rho(K_L) = \rho(T(-\Sigma^{-1})) = -\frac{\beta p_{hs} p_s}{\gamma_{I2}} + \frac{\beta p_s}{\gamma_{I2}} - \frac{\beta p_{hs} p_s}{\gamma_{I1}} + \frac{\beta p_s}{\gamma_{I1}} - \frac{\beta p_s \theta}{\gamma_{A2}} + \frac{\beta \theta}{\gamma_{A2}} - \frac{\beta p_s \theta}{\gamma_{A1}} + \frac{\beta \theta}{\gamma_{A1}} + \frac{\beta p_{hs} p_s}{\epsilon_H} + \frac{\beta \theta}{\epsilon_3} \quad (4)$$

The transmission term's  $\beta$  is therefore:

$$\beta = R_0 \epsilon_3 \epsilon_H \gamma_{A1} \gamma_{A2} \gamma_{I1} \gamma_{I2} \div \begin{pmatrix} -\epsilon_3 \epsilon_H \gamma_{A1} \gamma_{A2} \gamma_{I1} p_{hs} p_s + \epsilon_3 \epsilon_H \gamma_{A1} \gamma_{A2} \gamma_{I1} p_s - \epsilon_3 \epsilon_H \gamma_{A1} \gamma_{A2} \gamma_{I2} p_{hs} p_s + \epsilon_3 \epsilon_H \gamma_{A1} \gamma_{A2} \gamma_{I2} p_s - \\ \epsilon_3 \epsilon_H \gamma_{A1} \gamma_{I1} \gamma_{I2} p_s \theta + \epsilon_3 \epsilon_H \gamma_{A1} \gamma_{I1} \gamma_{I2} \theta - \epsilon_3 \epsilon_H \gamma_{A2} \gamma_{I1} \gamma_{I2} p_s \theta + \\ \epsilon_3 \epsilon_H \gamma_{A2} \gamma_{I1} \gamma_{I2} \theta + \epsilon_3 \gamma_{A1} \gamma_{A2} \gamma_{I1} \gamma_{I2} p_{hs} p_s + \epsilon_H \gamma_{A1} \gamma_{A2} \gamma_{I1} \gamma_{I2} \theta \end{pmatrix} \quad (5)$$
