# Supplementary material for: Modelling Disease Mitigation at Mass Gatherings: A Case Study of COVID-19 at the 2022 FIFA World Cup
Source: bioRxiv or medRxiv preprint supplement (doi:10.1101/2023.03.27.23287214), 2023-03-29
Supplement: Supplementary file [file media-3.pdf]

Supplementary Material: Differences in PRCCs between proportions of visitor clusters A and B effectively vaccinated ( $v_A$  and  $v_B$ ) and different testing regimes.

Martin David Grunnill

March 12, 2023

Table 1: Differences in PRCCs between different testing regimes and proportions of visitor clusters A effectively vaccinated ( $v_A$ ) under the "No Testing" test regime.

| Test Regime      | Output                 | Differences in PCC | z-score      | p_value (one tailed) | p_value (two tailed) |
|------------------|------------------------|--------------------|--------------|----------------------|----------------------|
| Pre-travel RTPCR | peak hospitalised      | 0.285485156        | 23.29013569  | 2.79E-120            | 5.58E-120            |
| Pre-travel RTPCR | peak infected          | 0.129090405        | 10.53131131  | 3.10E-26             | 6.20E-26             |
| Pre-travel RTPCR | total hospitalisations | 0.29415326         | 23.99728747  | 1.48E-127            | 2.97E-127            |
| Pre-travel RTPCR | total infections       | 0.133077878        | 10.85661291  | 9.28E-28             | 1.86E-27             |
| Pre-travel RA    | peak hospitalised      | 0.288110701        | 23.50433005  | 1.84E-122            | 3.68E-122            |
| Pre-travel RA    | peak infected          | 0.133793811        | 10.91501936  | 4.89E-28             | 9.77E-28             |
| Pre-travel RA    | total hospitalisations | 0.296710205        | 24.20588532  | 9.64E-130            | 1.93E-129            |
| Pre-travel RA    | total infections       | 0.137796267        | 11.2415434   | 1.27E-29             | 2.55E-29             |
| Pre-match RTPCR  | peak hospitalised      | 0.204216058        | 16.66012959  | 1.28E-62             | 2.55E-62             |
| Pre-match RTPCR  | peak infected          | -0.016631435       | -1.356807408 | 0.087421207          | 0.174842413          |
| Pre-match RTPCR  | total hospitalisations | 0.210622949        | 17.18280958  | 1.79E-66             | 3.57E-66             |
| Pre-match RTPCR  | total infections       | -0.014160842       | -1.155254258 | 0.123993161          | 0.247986321          |
| Pre-match RA     | peak hospitalised      | 0.187966736        | 15.3344953   | 2.25E-53             | 4.50E-53             |
| Pre-match RA     | peak infected          | -0.046151116       | -3.765049563 | 8.33E-05             | 0.000166516          |
| Pre-match RA     | total hospitalisations | 0.1937887          | 15.80945636  | 1.34E-56             | 2.68E-56             |
| Pre-match RA     | total infections       | -0.044061205       | -3.594552704 | 0.000162475          | 0.000324949          |
| Double RTPCR     | peak hospitalised      | 0.197806124        | 16.13720145  | 6.99E-59             | 1.40E-58             |
| Double RTPCR     | peak infected          | -0.02778936        | -2.267080963 | 0.01169264           | 0.02338528           |
| Double RTPCR     | total hospitalisations | 0.203861313        | 16.6311892   | 2.07E-62             | 4.14E-62             |
| Double RTPCR     | total infections       | -0.025474225       | -2.078210188 | 0.018845002          | 0.037690004          |
| Double RA        | peak hospitalised      | 0.182140341        | 14.85917278  | 3.03E-50             | 6.07E-50             |
| Double RA        | peak infected          | -0.055514067       | -4.528887535 | 2.96E-06             | 5.93E-06             |
| Double RA        | total hospitalisations | 0.187965284        | 15.33437687  | 2.25E-53             | 4.51E-53             |
| Double RA        | total infections       | -0.053584406       | -4.371463987 | 6.17E-06             | 1.23E-05             |
| RTPCR then RA    | peak hospitalised      | 0.180141577        | 14.69611179  | 3.41E-49             | 6.83E-49             |
| RTPCR then RA    | peak infected          | -0.058808634       | -4.797661221 | 8.03E-07             | 1.61E-06             |
| RTPCR then RA    | total hospitalisations | 0.185887191        | 15.16484415  | 3.02E-52             | 6.04E-52             |
| RTPCR then RA    | total infections       | -0.056910348       | -4.642797346 | 1.72E-06             | 3.44E-06             |
| RA then RTPCR    | peak hospitalised      | 0.199562542        | 16.2804916   | 6.79E-60             | 1.36E-59             |
| RA then RTPCR    | peak infected          | -0.024925421       | -2.033438217 | 0.021004135          | 0.04200827           |
| RA then RTPCR    | total hospitalisations | 0.205783196        | 16.7879782   | 1.49E-63             | 2.99E-63             |
| RA then RTPCR    | total infections       | -0.02258497        | -1.8425022   | 0.032700863          | 0.065401725          |

Table 2: Differences in PRCCs between different testing regimes and proportions of visitor clusters B effectively vaccinated ( $v_B$ ) under the "No Testing" test regime.

| Test Regime      | Output                 | Differences in PCC | z-score      | p_value (one tailed) | p_value (two tailed) |
|------------------|------------------------|--------------------|--------------|----------------------|----------------------|
| Pre-travel RTPCR | peak hospitalised      | 0.260997181        | 21.29238473  | 6.68E-101            | 1.34E-100            |
| Pre-travel RTPCR | peak infected          | 0.10663991         | 8.699779777  | 1.66E-18             | 3.33E-18             |
| Pre-travel RTPCR | total hospitalisations | 0.266416197        | 21.73447292  | 4.84E-105            | 9.69E-105            |
| Pre-travel RTPCR | total infections       | 0.11089937         | 9.047270284  | 7.33E-20             | 1.47E-19             |
| Pre-travel RA    | peak hospitalised      | 0.263622727        | 21.50657909  | 6.76E-103            | 1.35E-102            |
| Pre-travel RA    | peak infected          | 0.111343316        | 9.083487829  | 5.26E-20             | 1.05E-19             |
| Pre-travel RA    | total hospitalisations | 0.268973142        | 21.94307077  | 5.04E-107            | 1.01E-106            |
| Pre-travel RA    | total infections       | 0.115617759        | 9.432200771  | 2.01E-21             | 4.02E-21             |
| Pre-match RTPCR  | peak hospitalised      | 0.179728083        | 14.66237863  | 5.61E-49             | 1.12E-48             |
| Pre-match RTPCR  | peak infected          | -0.039081929       | -3.18833894  | 0.000715463          | 0.001430927          |
| Pre-match RTPCR  | total hospitalisations | 0.182885886        | 14.91999504  | 1.22E-50             | 2.44E-50             |
| Pre-match RTPCR  | total infections       | -0.03633935        | -2.964596884 | 0.001515399          | 0.003030798          |
| Pre-match RA     | peak hospitalised      | 0.163478761        | 13.33674434  | 7.08E-41             | 1.42E-40             |
| Pre-match RA     | peak infected          | -0.068601611       | -5.596581096 | 1.09E-08             | 2.19E-08             |
| Pre-match RA     | total hospitalisations | 0.166051637        | 13.54664181  | 4.15E-42             | 8.29E-42             |
| Pre-match RA     | total infections       | -0.066239713       | -5.40389533  | 3.26E-08             | 6.52E-08             |
| Double RTPCR     | peak hospitalised      | 0.17331815         | 14.13945049  | 1.08E-45             | 2.17E-45             |
| Double RTPCR     | peak infected          | -0.050239854       | -4.098612496 | 2.08E-05             | 4.16E-05             |
| Double RTPCR     | total hospitalisations | 0.17612425         | 14.36837465  | 4.09E-47             | 8.17E-47             |
| Double RTPCR     | total infections       | -0.047652733       | -3.887552814 | 5.06E-05             | 0.00010126           |
| Double RA        | peak hospitalised      | 0.157652367        | 12.86142182  | 3.71E-38             | 7.42E-38             |
| Double RA        | peak infected          | -0.077964562       | -6.360419068 | 1.01E-10             | 2.01E-10             |
| Double RA        | total hospitalisations | 0.160228221        | 13.07156232  | 2.39E-39             | 4.79E-39             |
| Double RA        | total infections       | -0.075762914       | -6.180806613 | 3.19E-10             | 6.38E-10             |
| RTPCR then RA    | peak hospitalised      | 0.155653602        | 12.69836083  | 3.02E-37             | 6.04E-37             |
| RTPCR then RA    | peak infected          | -0.081259128       | -6.629192753 | 1.69E-11             | 3.38E-11             |
| RTPCR then RA    | total hospitalisations | 0.158150128        | 12.9020296   | 2.19E-38             | 4.38E-38             |
| RTPCR then RA    | total infections       | -0.079088856       | -6.452139972 | 5.51E-11             | 1.10E-10             |
| RA then RTPCR    | peak hospitalised      | 0.175074568        | 14.28274064  | 1.40E-46             | 2.80E-46             |
| RA then RTPCR    | peak infected          | -0.047375915       | -3.86496975  | 5.56E-05             | 0.000111103          |
| RA then RTPCR    | total hospitalisations | 0.178046133        | 14.52516365  | 4.20E-48             | 8.39E-48             |
| RA then RTPCR    | total infections       | -0.044763479       | -3.651844825 | 0.000130182          | 0.000260363          |
